# Supplementary figures and images for: Carrier-filtering and phonon-blocking AgSnSe2-decorated grain boundaries to boost the thermoelectric performance of Cu2Sn0.9Co0.1S3
Source: Royal Society of Chemistry journal article supplement (doi:10.1039/d2nr05699b), 2022-12-13

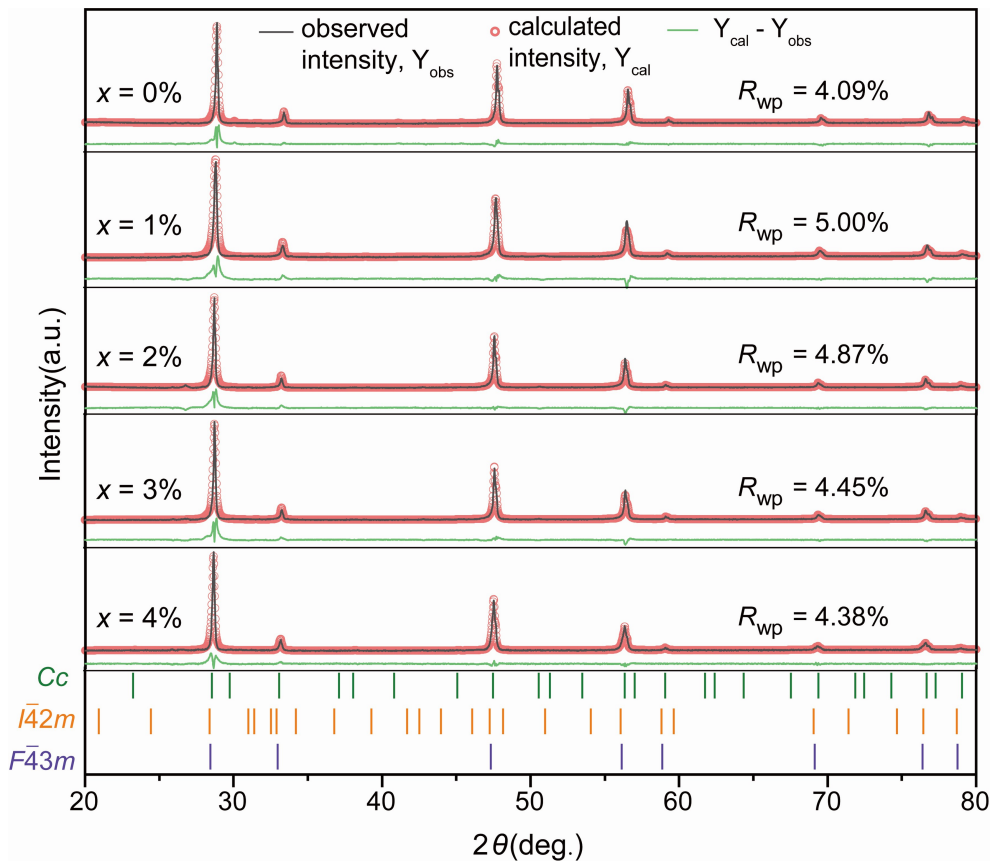

Supplement: d2nr05699b2.pdf [file d2nr05699b2.pdf]
